# Supplementary material for: Prussian blue as positive electrode material for aqueous sodium-ion capacitor with excellent performance
Source: Royal Society of Chemistry journal article supplement (doi:10.1039/c6ra21500a), 2016-01-01
Supplement: c6ra21500a1.pdf [file c6ra21500a1.pdf]

Electronic Supplementary Information (ESI):

**A prussian blue as positive electrode material for aqueous sodium-ion capacitor with excellent performance<sup>†</sup>**

Lei Zhou,<sup>a</sup> Zhengkai Yang,<sup>a</sup> Chunyang Li,<sup>a</sup> Bingwei Chen,<sup>b</sup> Yanfeng Wang,<sup>b</sup> Lijun Fu,<sup>a</sup> Yusong Zhu,<sup>a,\*</sup> Xiang Liu,<sup>\*a</sup> and Yuping Wu<sup>\*a,b</sup>

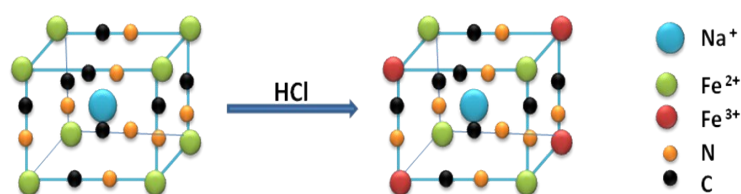

**Figure S1.** Schematic illustration of the preparation of the PB.

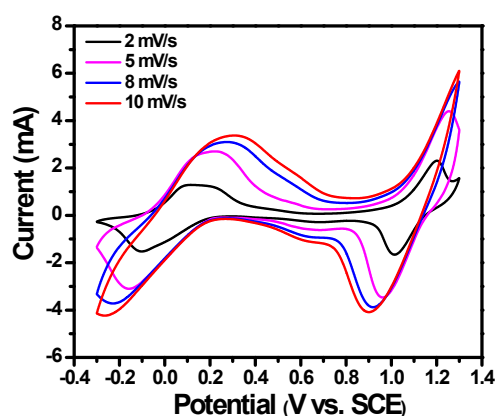

**Figure S2.** CV curves of the PB at different scan rates.

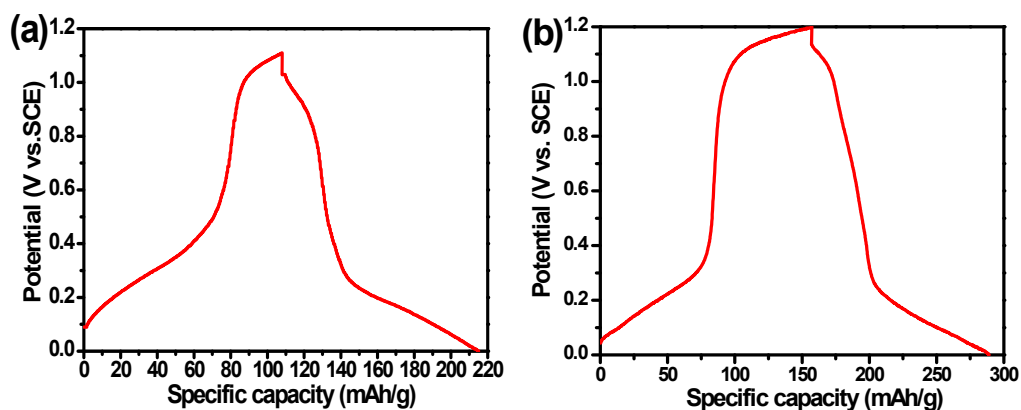

**Figure S3.** The galvanostatic charge-discharge curves of the PB at the current density of 0.5 A g<sup>-1</sup>. (a) the potential range from 0 to 1.1 V (vs. SCE), and (b) the potential range from 0 to 1.2 V (vs. SCE).

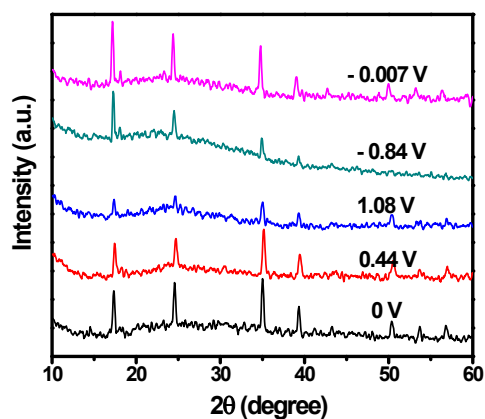

**Figure S4** The XRD patterns of the PB electrode at various charge and discharge states in the range of 10-60°.

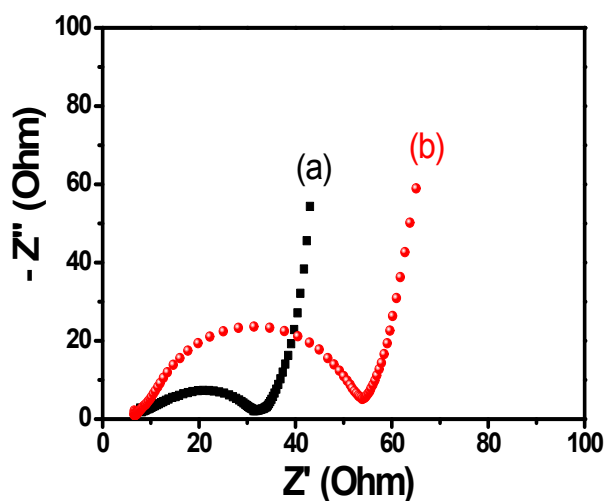

**Figure S5** Impedance spectra of the PB/AC capacitor before (a) and after (b) 1000 cycles charged-discharged at  $1 \text{ A g}^{-1}$ .

**Table S1.** Content of elements of the PB sample.

| Element       | Na     | Fe     | C      | N      |
|---------------|--------|--------|--------|--------|
| Content (wt.) | 10.65% | 38.39% | 23.52% | 27.44% |
